# Supplementary material for: Predictors of chronic pain and level of physical function in total knee arthroplasty: a protocol for a systematic review and meta-analysis
Source: PubMed Central journal article supplement — BMJ Open. 2020 Sep 10;10(9):e037674. doi: 10.1136/bmjopen-2020-037674 (PMC7485240; doi:10.1136/bmjopen-2020-037674), 2020-09-10
Supplement: bmjopen-2020-037674supp001.pdf [file bmjopen-2020-037674supp001.pdf]

**Ovid MEDLINE(R) Epub Ahead of Print, In-Process & Other Non-Indexed Citations,  
Ovid MEDLINE(R) Daily and Ovid MEDLINE(R) <2000 to Present>**

Search date: 01.01.2000 - 27.06.2018.

Updated search: 28.06.2018 - 01.08.2019

|    |                                                                                                                                                   |
|----|---------------------------------------------------------------------------------------------------------------------------------------------------|
| 1  | Arthroplasty, Replacement, Knee/                                                                                                                  |
| 2  | (tkr or tjkr or tka or tjka).tw,kf.                                                                                                               |
| 3  | (knee* adj3 (arthroplast* or replacement*)).tw,kf.                                                                                                |
| 4  | (total adj2 knee*).tw,kf.                                                                                                                         |
| 5  | (knee* adj2 prosthes*).tw,kf.                                                                                                                     |
| 6  | or/1-5                                                                                                                                            |
| 7  | risk/ or risk factors/ or logistic models/ or protective factors/ or risk assessment/                                                             |
| 8  | prognosis/ or (prognos* or risk* or predict*).tw,kf.                                                                                              |
| 9  | (preoperative factor* or pre operative factor* or protective factor*).tw,kf.                                                                      |
| 10 | or/7-9                                                                                                                                            |
| 11 | and/6,10                                                                                                                                          |
| 12 | (pain adj3 (post* or ongoing or on going or long* or persist* or prolong* or after or follow*)).tw,kw.                                            |
| 13 | pain, postoperative/                                                                                                                              |
| 14 | (Pain/ or chronic pain/ or musculoskeletal pain/) and (post* or ongoing or on going or long* or persist* or prolonged or after or follow*).tw,kf. |
| 15 | cohort studies/ or follow-up studies/ or longitudinal studies/ or prospective studies/ or retrospective studies/                                  |
| 16 | pain.tw,kf.                                                                                                                                       |
| 17 | and/15-16                                                                                                                                         |
| 18 | or/12-14,17                                                                                                                                       |
| 19 | and/11,18                                                                                                                                         |
| 20 | (function* or stiffness or contracture*).tw,kf.                                                                                                   |
| 21 | (muscle adj3 (strength* or weakness or fatigue or tonus)).tw,kf.                                                                                  |
| 22 | Contracture/                                                                                                                                      |
| 23 | "Recovery of Function"/                                                                                                                           |
| 24 | "Range of Motion, Articular"/                                                                                                                     |
| 25 | locomotion/ or walking/ or gait/ or walking speed/ or stair climbing/                                                                             |
| 26 | "Activities of Daily Living"/ or (adl or (daily adj3 activit*)).tw,kf.                                                                            |
| 27 | Movement/                                                                                                                                         |
| 28 | muscle fatigue/ or muscle tonus/ or physical exertion/ or postural balance/ or Muscle Strength/                                                   |

|    |                                                                                                                                                                                                                                                                                                                                  |
|----|----------------------------------------------------------------------------------------------------------------------------------------------------------------------------------------------------------------------------------------------------------------------------------------------------------------------------------|
| 29 | (sitting or lying or standing or balance or posture or rising or neeling or bend* or walk* or gait or stair* or extension* or stability or contracture* or movement* or motion* or locomotion* or mobility or twisting or pivoting or straighten* or swelling or grinding or clicking or squatting or running or jumping).tw,kf. |
| 30 | treatment outcome/ or treatment failure/ or outcome*.tw,kf.                                                                                                                                                                                                                                                                      |
| 31 | patient reported outcome measures/                                                                                                                                                                                                                                                                                               |
| 32 | ("Knee injury and Osteoarthritis Outcome Score" or womac or koos or "American Knee Society Score" or AKSS or Kellgren Lawrence).tw,kf.                                                                                                                                                                                           |
| 33 | or/20-32                                                                                                                                                                                                                                                                                                                         |
| 34 | cohort studies/ or follow-up studies/ or longitudinal studies/ or prospective studies/ or retrospective studies/                                                                                                                                                                                                                 |
| 35 | Postoperative Period/                                                                                                                                                                                                                                                                                                            |
| 36 | (post* or after or follow* or cohort* or prospectiv* or longitudinal).tw,kf.                                                                                                                                                                                                                                                     |
| 37 | or/34-36                                                                                                                                                                                                                                                                                                                         |
| 38 | and/11,33,37                                                                                                                                                                                                                                                                                                                     |
| 39 | or/19,38                                                                                                                                                                                                                                                                                                                         |
| 40 | limit 39 to yr="2000 -Current"                                                                                                                                                                                                                                                                                                   |
| 41 | limit 40 to "reviews (best balance of sensitivity and specificity)"                                                                                                                                                                                                                                                              |
| 42 | 40 not 41                                                                                                                                                                                                                                                                                                                        |

**Embase Classic+Embase 1947 to 2018 June 25**

Search date: 01.01.2000 - 27.06.2018.

Updated search: 28.06.2018 - 01.08.2019

| #  | Searches                                                                                                                                                                                          |
|----|---------------------------------------------------------------------------------------------------------------------------------------------------------------------------------------------------|
| 1  | knee replacement/ or total knee arthroplasty/                                                                                                                                                     |
| 2  | (tkr or tjkr or tka or tjka).tw,kw.                                                                                                                                                               |
| 3  | (knee adj3 (arthroplast* or replacement*)).tw,kw.                                                                                                                                                 |
| 4  | (total adj2 knee*).tw,kw.                                                                                                                                                                         |
| 5  | (knee* adj2 prothes*).tw,kw.                                                                                                                                                                      |
| 6  | or/1-5                                                                                                                                                                                            |
| 7  | risk factor/ or risk/ or protection/ or risk assessment/                                                                                                                                          |
| 8  | prognosis/ or (prognos* or risk* or predict*).tw,kw.                                                                                                                                              |
| 9  | "prediction and forecasting"/ or prediction/                                                                                                                                                      |
| 10 | (preoperative factor* or pre operative factor* or protective factor*).tw,kw.                                                                                                                      |
| 11 | or/7-10                                                                                                                                                                                           |
| 12 | and/6,11                                                                                                                                                                                          |
| 13 | (pain adj3 (post* or ongoing or on going or long* or persist* or prolong* or after or follow*)).tw,kw.                                                                                            |
| 14 | postoperative pain/                                                                                                                                                                               |
| 15 | (pain/ or chronic pain/ or musculoskeletal pain/) and (post* or ongoing or on going or long* or persist* or prolonged or after or follow*).tw,kw.                                                 |
| 16 | cohort analysis/ or follow up/ or longitudinal study/ or prospective study/ or retrospective study/                                                                                               |
| 17 | pain.tw,kw.                                                                                                                                                                                       |
| 18 | and/16-17                                                                                                                                                                                         |
| 19 | or/13-15,18                                                                                                                                                                                       |
| 20 | and/12,19                                                                                                                                                                                         |
| 21 | knee function/ or muscle function/ or muscle rigidity/ or muscle contraction/ or muscle strength/ or muscle fatigue/ or muscle function/ or muscle stretching/ or muscle weakness/                |
| 22 | contracture/ or flexion contracture/ or joint contracture/ or muscle contracture/                                                                                                                 |
| 23 | convalescence/                                                                                                                                                                                    |
| 24 | locomotion/ or climbing/ or stair climbing/ or jumping/ or walking/ or gait/ or walking speed/                                                                                                    |
| 25 | daily life activity/ or (daily life activity or activities of daily living or adl).tw,kw.                                                                                                         |
| 26 | exp musculoskeletal function/ or Movement/                                                                                                                                                        |
| 27 | joint swelling/ or grinding/                                                                                                                                                                      |
| 28 | (function* or stiffness or contracture*).tw,kw.                                                                                                                                                   |
| 29 | (muscle adj3 (strength* or weakness or fatigue or tonus)).tw,kw.                                                                                                                                  |
| 30 | (sitting or lying or standing or balance or posture or rising or neeling or bend* or walk* or gait or stair* or extension* or stability or contracture* or movement* or motion* or locomotion* or |

|    |                                                                                                                                                                                                                                                                                               |
|----|-----------------------------------------------------------------------------------------------------------------------------------------------------------------------------------------------------------------------------------------------------------------------------------------------|
|    | mobility or twisting or pivoting or straighten* or swelling or grinding or clicking or squatting or running or jumping).tw,kw.                                                                                                                                                                |
| 31 | treatment outcome/ or treatment failure/ or patient-reported outcome/ or clinical outcome/ or outcome*.tw,kw.                                                                                                                                                                                 |
| 32 | "knee injury and osteoarthritis outcome score"/ or "Western Ontario and McMaster Universities Osteoarthritis Index"/ or ("Knee injury and Osteoarthritis Outcome Score" or womac or koos or "American Knee Society Score" or AKSS or Kellgren Lawrence).tw,kw.                                |
| 33 | or/21-32                                                                                                                                                                                                                                                                                      |
| 34 | cohort analysis/ or follow up/ or longitudinal study/ or prospective study/ or retrospective study.mp. [mp=title, abstract, heading word, drug trade name, original title, device manufacturer, drug manufacturer, device trade name, keyword, floating subheading word, candidate term word] |
| 35 | postoperative period/                                                                                                                                                                                                                                                                         |
| 36 | (post* or after or follow* or cohort* or prospectiv* or longitudinal).tw,kw.                                                                                                                                                                                                                  |
| 37 | or/34-36                                                                                                                                                                                                                                                                                      |
| 38 | and/12,33,37                                                                                                                                                                                                                                                                                  |
| 39 | or/20,38                                                                                                                                                                                                                                                                                      |
| 40 | limit 39 to yr="2000 -Current"                                                                                                                                                                                                                                                                |
| 41 | limit 40 to conference abstract                                                                                                                                                                                                                                                               |
| 42 | 40 not 41                                                                                                                                                                                                                                                                                     |
| 43 | limit 40 to "reviews (best balance of sensitivity and specificity)"                                                                                                                                                                                                                           |
| 44 | 43 not 41                                                                                                                                                                                                                                                                                     |
| 45 | 42 not 43                                                                                                                                                                                                                                                                                     |

**CINAHL( Ebsco):**

Search date: 01.01.2000 - 27.06.2018.

Updated search: 28.06.2018 - 01.08.2019

| #   | Query                                                                                                                                                                             | Limiters/Expanders            |
|-----|-----------------------------------------------------------------------------------------------------------------------------------------------------------------------------------|-------------------------------|
| S1  | (MH "Arthroplasty, Replacement, Knee+")                                                                                                                                           | Search modes - Boolean/Phrase |
| S2  | TX tkr or tjkr or tka or tjka                                                                                                                                                     | Search modes - Boolean/Phrase |
| S3  | TX knee* N3 (arthroplast* or replacement*)                                                                                                                                        | Search modes - Boolean/Phrase |
| S4  | TX (total N2 knee*)                                                                                                                                                               | Search modes - Boolean/Phrase |
| S5  | TX (knee* N2 prosthes*)                                                                                                                                                           | Search modes - Boolean/Phrase |
| S6  | S1 OR S2 OR S3 OR S4 OR S5                                                                                                                                                        | Search modes - Boolean/Phrase |
| S7  | (MH "Risk Factors")                                                                                                                                                               | Search modes - Boolean/Phrase |
| S8  | (MH "Risk Assessment")                                                                                                                                                            | Search modes - Boolean/Phrase |
| S9  | MH "Prognosis")                                                                                                                                                                   | Search modes - Boolean/Phrase |
| S10 | TX prognos* or risk* or predict* or preoperative factor* or protective factor*                                                                                                    | Search modes - Boolean/Phrase |
| S11 | S7 OR S8 OR S9 OR S10                                                                                                                                                             | Search modes - Boolean/Phrase |
| S12 | S6 AND S11                                                                                                                                                                        | Search modes - Boolean/Phrase |
| S13 | ( TX pain N2 (TX (post* or ongoing or "on going" or long* or persist* or prolong* or after or follow* ) ) OR (MH "Postoperative Pain") OR TX pain AND (MH "Prospective Studies+") | Search modes - Boolean/Phrase |
| S14 | (MH "Pain+") OR (MH "Knee Pain+") OR (MH "Muscle Pain") AND TX post* or ongoing or "on going" or long* or persist* or prolong* or after or follow*                                | Search modes - Boolean/Phrase |
| S15 | S13 OR S14                                                                                                                                                                        | Search modes - Boolean/Phrase |
| S16 | S12 AND S15                                                                                                                                                                       | Search modes - Boolean/Phrase |
| S17 | (MH "Movement") OR (MH "Hopping") OR (MH "Jumping") OR (MH "Kneeling+") OR (MH "Extension+") OR (MH "Locomotion") OR (MH "Walking+") OR (MH "Gait+") OR (MH                       | Search modes - Boolean/Phrase |

|     |                                                                                                                                                            |                                                                                       |
|-----|------------------------------------------------------------------------------------------------------------------------------------------------------------|---------------------------------------------------------------------------------------|
|     | "Step") OR (MH "Range of Motion") OR (MH "Rising") OR (MH "Sitting") OR (MH "Squatting") OR (MH "Stair Climbing") OR (MH "Standing+") OR (MH "Stretching") |                                                                                       |
| S18 | (MH "Muscle Fatigue") OR (MH "Muscle Strength+") OR (MH "Muscle Tonus")                                                                                    | Search modes - Boolean/Phrase                                                         |
| S19 | TX (function* or stiffness or contracture*)                                                                                                                | Search modes - Boolean/Phrase                                                         |
| S20 | TX (muscle N3 (strength* or weakness or fatigue or tonus))                                                                                                 | Search modes - Boolean/Phrase                                                         |
| S21 | (MH "Contracture+")                                                                                                                                        | Search modes - Boolean/Phrase                                                         |
| S22 | (MH "Activities of Daily Living+")                                                                                                                         | Search modes - Boolean/Phrase                                                         |
| S23 | TX (activities or daily living or adl)                                                                                                                     | Search modes - Boolean/Phrase                                                         |
| S24 | (MH "Treatment Outcomes+") OR (MH "Fatal Outcome") OR (MH "Treatment Failure")                                                                             | Search modes - Boolean/Phrase                                                         |
| S25 | TX outcome*                                                                                                                                                | Search modes - Boolean/Phrase                                                         |
| S26 | TX "Knee injury and Osteoarthritis Outcome Score" or womac or koos or "American Knee Society Score" or AKSS or Kellgren Lawrence)                          | Search modes - Boolean/Phrase                                                         |
| S27 | S17 OR S18 OR S19 OR S20 OR S21 OR S22 OR S23 OR S24 OR S25 OR S26                                                                                         | Search modes - Boolean/Phrase                                                         |
| S28 | (MH "Postoperative Period") OR (MH "Prospective Studies+")                                                                                                 | Search modes - Boolean/Phrase                                                         |
| S29 | TX (post* or after or follow* or cohort* or prospectiv* or longitudinal)                                                                                   | Search modes - Boolean/Phrase                                                         |
| S30 | S28 OR S29                                                                                                                                                 | Search modes - Boolean/Phrase                                                         |
| S31 | S12 AND S27 AND S30                                                                                                                                        | Search modes - Boolean/Phrase                                                         |
| S32 | S16 OR S31                                                                                                                                                 | Search modes - Boolean/Phrase                                                         |
| S33 | S16 OR S31                                                                                                                                                 | Limiters - Published Date: 20180601-20190831<br>Search modes - Boolean/Phrase         |
| S34 | S16 OR S31                                                                                                                                                 | Limiters - Published Date: 20000101-20180631; Clinical Queries: Review - Best Balance |

|  |  |                                  |
|--|--|----------------------------------|
|  |  | Search modes -<br>Boolean/Phrase |
|--|--|----------------------------------|

## The Cochrane Library

Search date: 01.01.2000 - 27.06.2018.

Updated search: 28.06.2018 - 01.08.2019

|     |                                                                                                                                                 |
|-----|-------------------------------------------------------------------------------------------------------------------------------------------------|
| #1  | MeSH descriptor: [Arthroplasty, Replacement, Knee] this term only                                                                               |
| #2  | tkr or tjkr or tka or tjka:ti,ab,kw (Word variations have been searched)                                                                        |
| #3  | knee near/3 (arthroplast* or replacement*):ti,ab,kw (Word variations have been searched)                                                        |
| #4  | total near/2 knee*:ti,ab,kw (Word variations have been searched)                                                                                |
| #5  | knee near/2 prostheses:ti,ab,kw or knee near/2 prosthesis:ti,ab,kw (Word variations have been searched)                                         |
| #6  | #1 or #2 or #3 or #4 or #5                                                                                                                      |
| #7  | MeSH descriptor: [Risk] explode all trees                                                                                                       |
| #8  | MeSH descriptor: [Prognosis] this term only                                                                                                     |
| #9  | prognos* or risk* or predict*:ti,ab,kw (Word variations have been searched)                                                                     |
| #10 | preoperative factor* or pre operative factor* or protective factor*:ti,ab,kw (Word variations have been searched)                               |
| #11 | #7 or #8 or #9 or #10                                                                                                                           |
| #12 | #6 and #11                                                                                                                                      |
| #13 | pain near/3 (post* or ongoing or "on going" or long* or persist* or prolong* or after or follow*):ti,ab,kw (Word variations have been searched) |
| #14 | MeSH descriptor: [Pain, Postoperative] this term only                                                                                           |
| #15 | MeSH descriptor: [Pain] this term only                                                                                                          |
| #16 | MeSH descriptor: [Chronic Pain] this term only                                                                                                  |
| #17 | MeSH descriptor: [Musculoskeletal Pain] this term only                                                                                          |
| #18 | #14 or #15 or #16 or #17                                                                                                                        |
| #19 | post* or ongoing or on going or long* or persist* or prolonged or after or follow*:ti,ab,kw (Word variations have been searched)                |
| #20 | #18 and #19                                                                                                                                     |
| #21 | MeSH descriptor: [Cohort Studies] explode all trees                                                                                             |
| #22 | pain:ti,ab,kw (Word variations have been searched)                                                                                              |
| #23 | #21 and #22                                                                                                                                     |
| #24 | #13 or #20 or #23                                                                                                                               |
| #25 | #12 and #24                                                                                                                                     |
| #26 | function* or stiffness or contracture*:ti,ab,kw (Word variations have been searched)                                                            |
| #27 | muscle near/3 (strength* or weakness or fatigue or tonus):ti,ab,kw (Word variations have been searched)                                         |
| #28 | MeSH descriptor: [Contracture] this term only                                                                                                   |
| #29 | MeSH descriptor: [Recovery of Function] this term only                                                                                          |
| #30 | MeSH descriptor: [Range of Motion, Articular] this term only                                                                                    |
| #31 | MeSH descriptor: [Locomotion] this term only                                                                                                    |
| #32 | MeSH descriptor: [Walking] explode all trees                                                                                                    |
| #33 | MeSH descriptor: [Activities of Daily Living] this term only                                                                                    |
| #34 | "activities of daily living" or adl:ti,ab,kw (Word variations have been searched)                                                               |
| #35 | MeSH descriptor: [Movement] this term only                                                                                                      |
| #36 | MeSH descriptor: [Muscle Fatigue] this term only                                                                                                |
| #37 | MeSH descriptor: [Muscle Tonus] this term only                                                                                                  |
| #38 | MeSH descriptor: [Physical Exertion] this term only                                                                                             |
| #39 | MeSH descriptor: [Postural Balance] this term only                                                                                              |



|     |                                                                                                                                                                                                                                                                                                                                                                                |
|-----|--------------------------------------------------------------------------------------------------------------------------------------------------------------------------------------------------------------------------------------------------------------------------------------------------------------------------------------------------------------------------------|
| #40 | MeSH descriptor: [Muscle Strength] this term only                                                                                                                                                                                                                                                                                                                              |
| #41 | sitting or lying or standing or balance or posture or rising or neeling or bend* or walk* or gait or stair* or extension* or stability or contracture* or movement* or motion* or locomotion* or mobility or twisting:ti,ab,kw or pivoting or straighten* or swelling or grinding or clicking or squatting or running or jumping:ti,ab,kw (Word variations have been searched) |
| #42 | MeSH descriptor: [Treatment Outcome] this term only                                                                                                                                                                                                                                                                                                                            |
| #43 | MeSH descriptor: [Treatment Failure] this term only                                                                                                                                                                                                                                                                                                                            |
| #44 | outcome:ti,ab,kw (Word variations have been searched)                                                                                                                                                                                                                                                                                                                          |
| #45 | MeSH descriptor: [Patient Reported Outcome Measures] this term only                                                                                                                                                                                                                                                                                                            |
| #46 | "Knee injury and Osteoarthritis Outcome Score" or womac or koos or "American Knee Society Score" or AKSS or "Kellgren Lawrence":ti,ab,kw (Word variations have been searched)                                                                                                                                                                                                  |
| #47 | #26 or #27 or #28 or #29 or #30 or #31 or #32 or #33 or #34 or #35 or #36 or #37 or #38 or #39 or #40 or #41 or #42 or #43 or #44 or #45 or #46                                                                                                                                                                                                                                |
| #48 | MeSH descriptor: [Cohort Studies] explode all trees                                                                                                                                                                                                                                                                                                                            |
| #49 | MeSH descriptor: [Postoperative Period] explode all trees                                                                                                                                                                                                                                                                                                                      |
| #50 | post* or after or follow* or cohort* or prospectiv* or longitudinal:ti,ab,kw (Word variations have been searched)                                                                                                                                                                                                                                                              |
| #51 | #48 or #49 or #50                                                                                                                                                                                                                                                                                                                                                              |
| #52 | #47 and #51                                                                                                                                                                                                                                                                                                                                                                    |
| #53 | #12 and #52                                                                                                                                                                                                                                                                                                                                                                    |
| #54 | #25 or #53 with Publication Year from 2018 to 2019, with Cochrane Library publication date Between Jun 2018 and Aug 2019                                                                                                                                                                                                                                                       |

**PRDro (Physiotherapy Evidence Database):**

Search date: 01.01.2000 - 27.06.2018.

Updated search: 28.06.2018 - 01.08.2019
